# Supplementary material
Source: Springer Nature journal article supplement (https://www.springermedizin.de/resource/supplementary/13000_2006_17_MOESM1_ESM.pdf/9623672)

**A**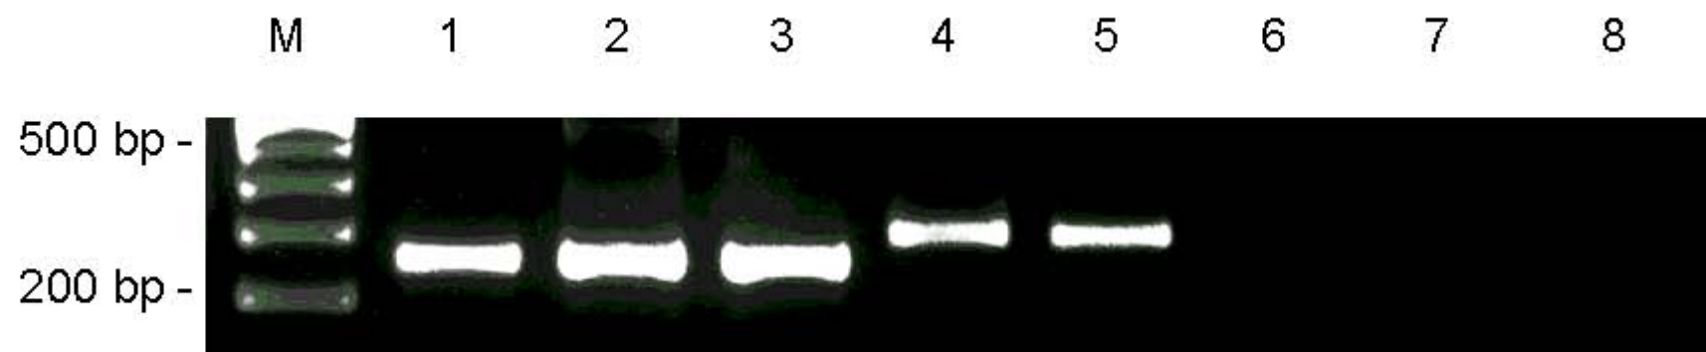**B**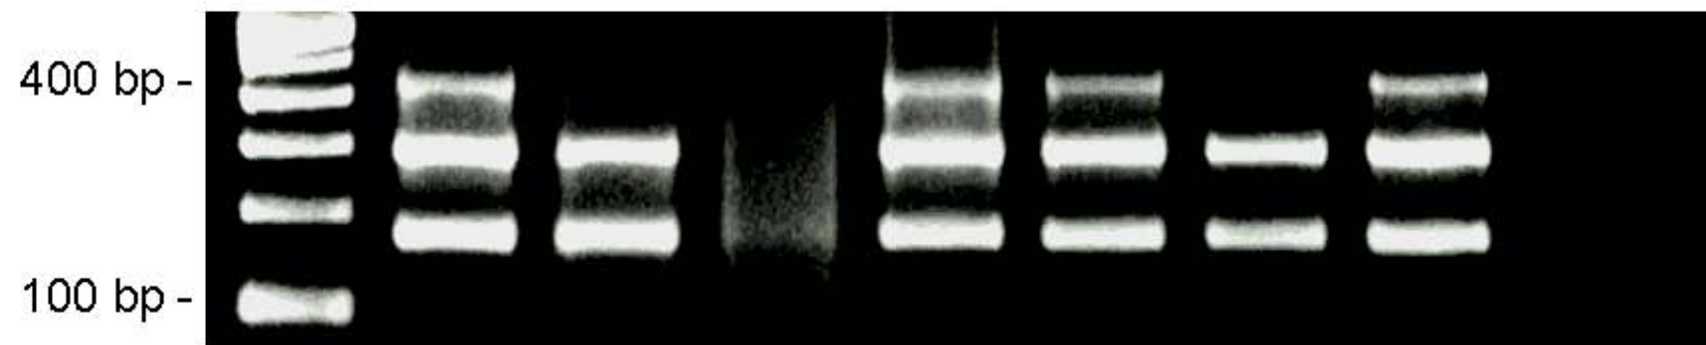

Supplement: MOESM1 [file 9623672]
